# Supplementary material
Source: Springer Nature journal article supplement (https://www.springermedizin.de/resource/supplementary/12943_2009_566_MOESM11_ESM.pdf/9554984)

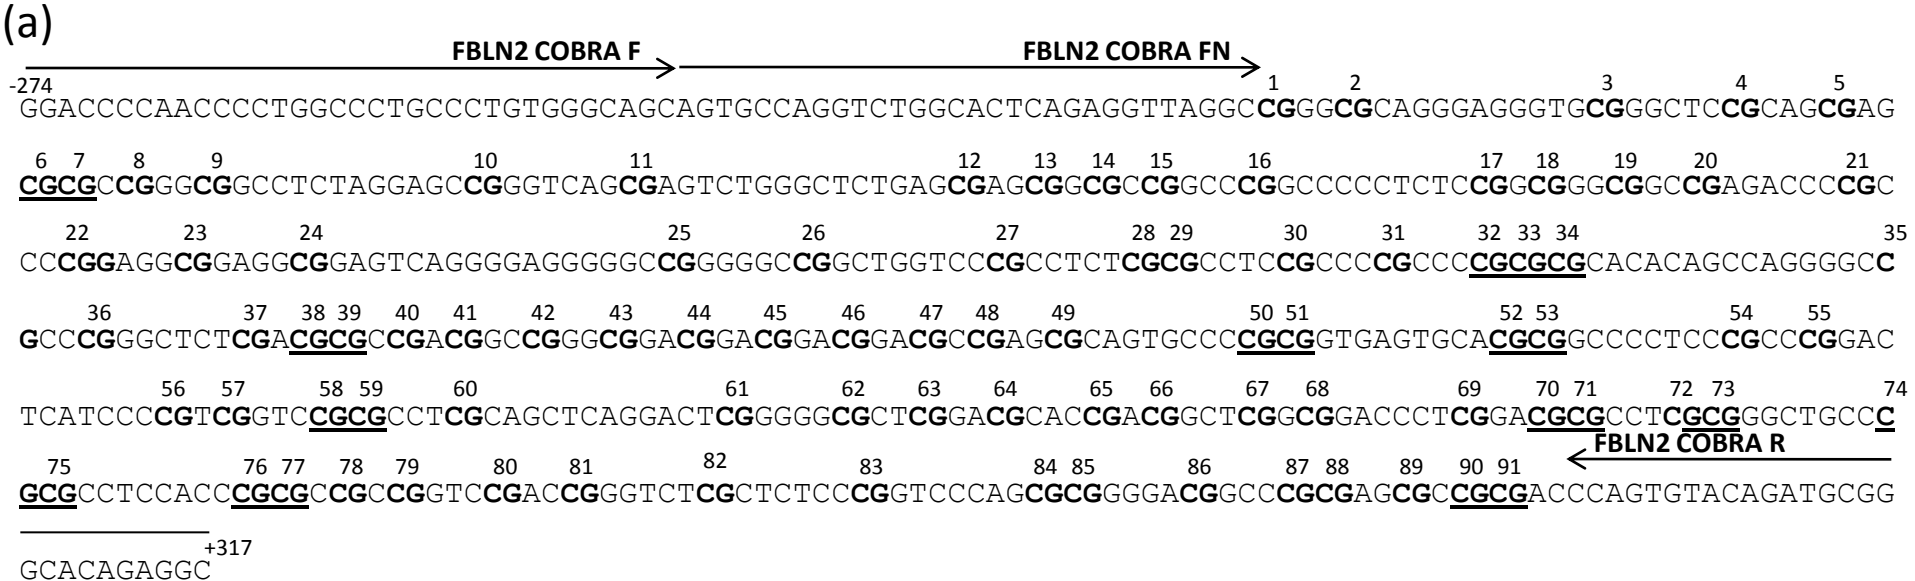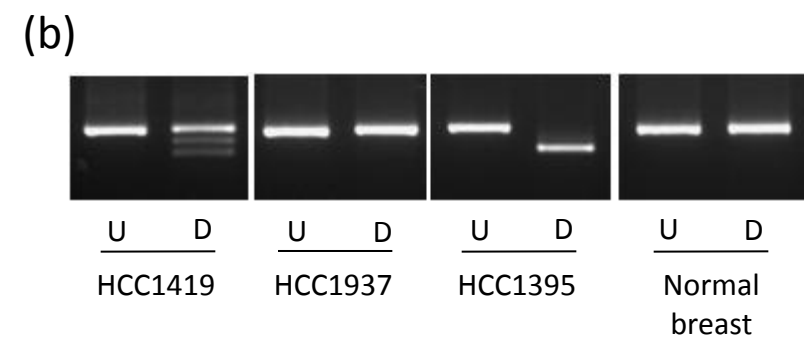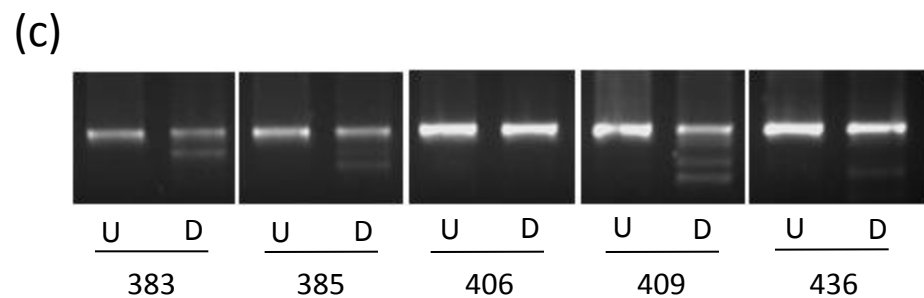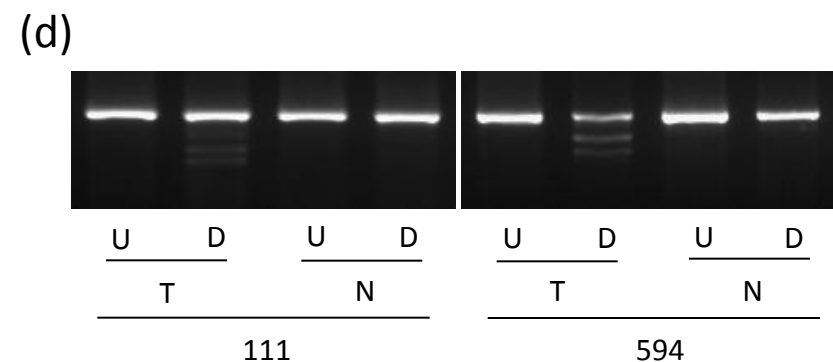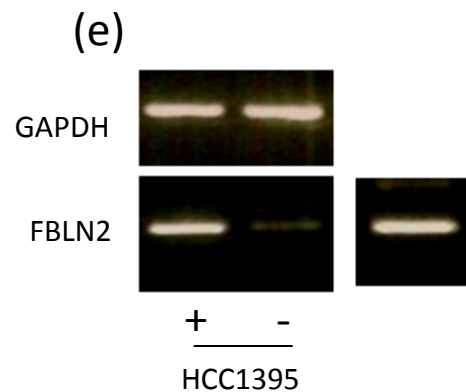

Supplement: MOESM11 [file 9554984]
